# Supplementary material
Source: PubMed Central journal article supplement (PMC5664155)
Supplement: NIHMS764082-supplement-supplement.pdf [file NIHMS764082-supplement-supplement.pdf]

## Supplementary Online Content

Aderibigbe OM, Priel DL, Lee C-CR, et al. Distinct cutaneous manifestations of *PLCG2*-associated antibody deficiency and immune dysregulation. *JAMA Dermatol*. Published online March 11, 2015. doi:10.1001/jamadermatol.2014.5641.

### eMethods

**eTable.** *PLCG2* PCR Conditions and Primers

**eFigure 1.** Neutrophil Superoxide Production

**eFigure 2.** Neutrophil Chemotaxis in Presence of Buffer or fMLF

This supplementary material has been provided by the authors to give readers additional information about their work.

## **eMethods<sup>1</sup>**

### ***Mutational Analysis of PLCG2***

RNA was extracted from peripheral blood mononuclear cells using RNAeasy kits (Qiagen) and complementary DNA (cDNA) was generated by reverse transcription from 1 µg of RNA via SuperScript II Reverse Transcriptase kit (Invitrogen) with random hexamer primers. Overlapping segments of *PLCG2* cDNA were amplified by PCR and the products were directly sequenced using BigDye Terminator chemistry (v3.1, Applied Biosystems) and a capillary sequencer (3130xl Genetic Analyzer, Applied Biosystems). Coding exons and intron-exon junctions of *PLCG2* were amplified by PCR using 50 ng of genomic DNA template, 1 µM of target-specific oligonucleotides and 12.5 µL of AmpliTaq Gold Fast PCR Master Mix (Applied Biosystems) in a final volume of 25 µL. All PCR reactions were carried out according to the manufacturer's published recommendations with using 15 second extension times using the primer pairs listed in eTable 1.

**eTable.<sup>1</sup> PLCG2 PCR Conditions and Primers**

| Primer target | Forward Primer Sequence  | Reverse Primer Sequence |
|---------------|--------------------------|-------------------------|
| cDNA seg 1    | GCCAGCTTCCTGATTTCTCC     | TTTAGAGTCAGCTGCCAAGC    |
| cDNA seg 2    | AAAGATTTTCGAGCGAGCAAA    | AGATGGAAGTGTTCAAAGCTGA  |
| cDNA seg 3    | CATCTTGCCCCTGATCAACT     | GTCCACCGCGTCATACTTCT    |
| cDNA seg 4    | GATGACACCATGCGTGAAAC     | CACTGGGAAGCTCGAGGTAA    |
| cDNA seg 5    | ATGGGAAGCCGGTCATCTAC     | GGGTATATCCTGGGGCACTT    |
| cDNA seg 6    | ATGGAGGACAAGAAGGACGA     | AGTGCTGGATGAGGGCATAG    |
| cDNA seg 7    | CCCCAATGACTACACCCTGT     | ACGAGCTCCACCAGACTCTC    |
| cDNA seg 8    | CGACTCCTATGCCATCACCT     | GGATGGGAAGTACTGCTGGA    |
| cDNA seg 9    | AGCGATGAGCTGAGCTTCTG     | CTTGGTTTTGCTGGTTGTT     |
| cDNA seg 10   | GGTTTCAGAGCATCCGAGAG     | GACTGTCAGCGTCATCAGGA    |
| cDNA seg 11   | GCAGATGAATCACGCATTGT     | GCCGCATCTCACAGAAAAC     |
| cDNA seg 12   | CGATCCCAACTTTCTTGCTC     | GATGGCAGGCTTGAAGAAAA    |
| Exon 1        | CGGGTTGCCTCAGTTTCTT      | CTGAGCCAGGACGCAGAC      |
| Exon 2        | TGCCTTGCCACTAGAACCTT     | TGACAAGACAGGAAGGTGGA    |
| Exon 3        | GATCCTGTTGGGAAGGAAG      | TCAAACCATGACCCCAAAT     |
| Exon 4        | CAGCATAGGCTTCTCCATC      | GTAGAGCCCACACCGCTACT    |
| Exon 5        | TGCACATTCCGTAGGACTCA     | CTCCCGACAAGTCATGCTC     |
| Exon 6        | GGAAGTATGGGAGCAGCTA      | ACGGAAGTCAAAGGCAAGC     |
| Exon 7        | GCATGCCATTTCTGAAACAA     | TGGGTTTCTTAGGAACATGC    |
| Exon 8        | CCTTTTGCTTCTTAAGTTTCTGTT | ATCTCTATCCACGCCACAGG    |
| Exon 9        | TGGCCAACCTGGTACCTAAC     | TCGTTCCATGAAGACAGGTG    |
| Exon 10       | GTCTTCGATTGCGACTGGAT     | CAGCAAAGTTCTCCAAGGAA    |
| Exon 11       | CGTGGGTAAGTGGGCTGAGG     | CTCCACCTGCTTACAACAG     |
| Exon 12       | ACAACACCCTGAGGTGCAG      | TCGAAAGAAAACATGGAGCA    |
| Exon 13       | TCTAGTAACTGAACTGGTGTGTGG | TTTGCCTGTCTGTCCATCTG    |
| Exon 14       | GCAGATGTGGGGTTGTG        | AGGACATAGAAGTGGTGAACG   |
| Exon 15       | GGGAAGAGGCAGATGAAGG      | TGGGAACAAGACAGGCGTAT    |
| Exon 16       | AACTGGGAAAAGCACATCCA     | CAGAGAAGCCACATGGGAAG    |
| Exon 17       | TGAGGCTGGCCTCTCTATGT     | CCTGCCTGAGCTAGAACCAC    |
| Exon 18       | AGGAGCAGAGGGAAGGTTGT     | ACCACCAGGCCAGCTTCT      |
| Exon 19       | TGGTGCCATTATCTTGTCTCTC   | GTGAGCCTCCACCTGAAGTT    |
| Exon 20       | CCCCTTCTCTAAGGCTGGA      | TGCTGAATTCATGAACAGATGA  |
| Exon 21       | AAGGAAGCCTAGAACCCTTGT    | AAGTCTTCCCTTGCCCTGTT    |
| Exon 22       | GGCCTGACCTTTTCTTCTT      | GACAAAGGGGGTTCAGACTTG   |
| Exon 23       | CATCAGAATTGAGCCAGCAG     | GCAGCACATGGAAAAATTCA    |
| Exon 24       | AAACGGTGTGCTTTGGAAAC     | AGCCACCTCCCTGTGTAGG     |
| Exon 25       | CCATGAGAGAAACAGCTCAGG    | TCTGAATCCACCTGGTCTCC    |
| Exon 26       | TGTGCAAGAAAGCAAAGTGG     | CTCTGCCCCCTCTGAAAATA    |
| Exon 27       | AATCTGAGCATCCAGCCATT     | CACCACATGGTATCGCTGAC    |
| Exon 28       | TTGAACAGCTGCCTCACATT     | CAAGACAACCAGCCTCCCTA    |
| Exon 29       | TCATCCAGTGTCACTCTAGAACC  | CAAATCCCCCACAAGA        |
| Exon 30       | GGTTGCTAAGGGGATTCACA     | CCACCCAATCGGTTTTACAG    |
| Exon 31       | CCTATGATCCCGAGGTAGCC     | CATGCTTGGGCTAGACAATTC   |
| Exon 32       | CTTGTGAGATGCCAGGTTCA     | CAACTCAGAGGGCTTTCCAG    |
| Exon 33       | TGGAGTCTGCCTCTCTGACA     | TCATCCTCCATGGACATCAG    |

<sup>1</sup> Mutational analysis and PCR data previously described by Ombrello MJ, Remmers EF, Sun G, et al. Cold urticaria, immunodeficiency, and autoimmunity related to PLCG2 deletions. *N Engl J Med* 2012;366:330-8.

**eFigure 1. Neutrophil Superoxide Production**

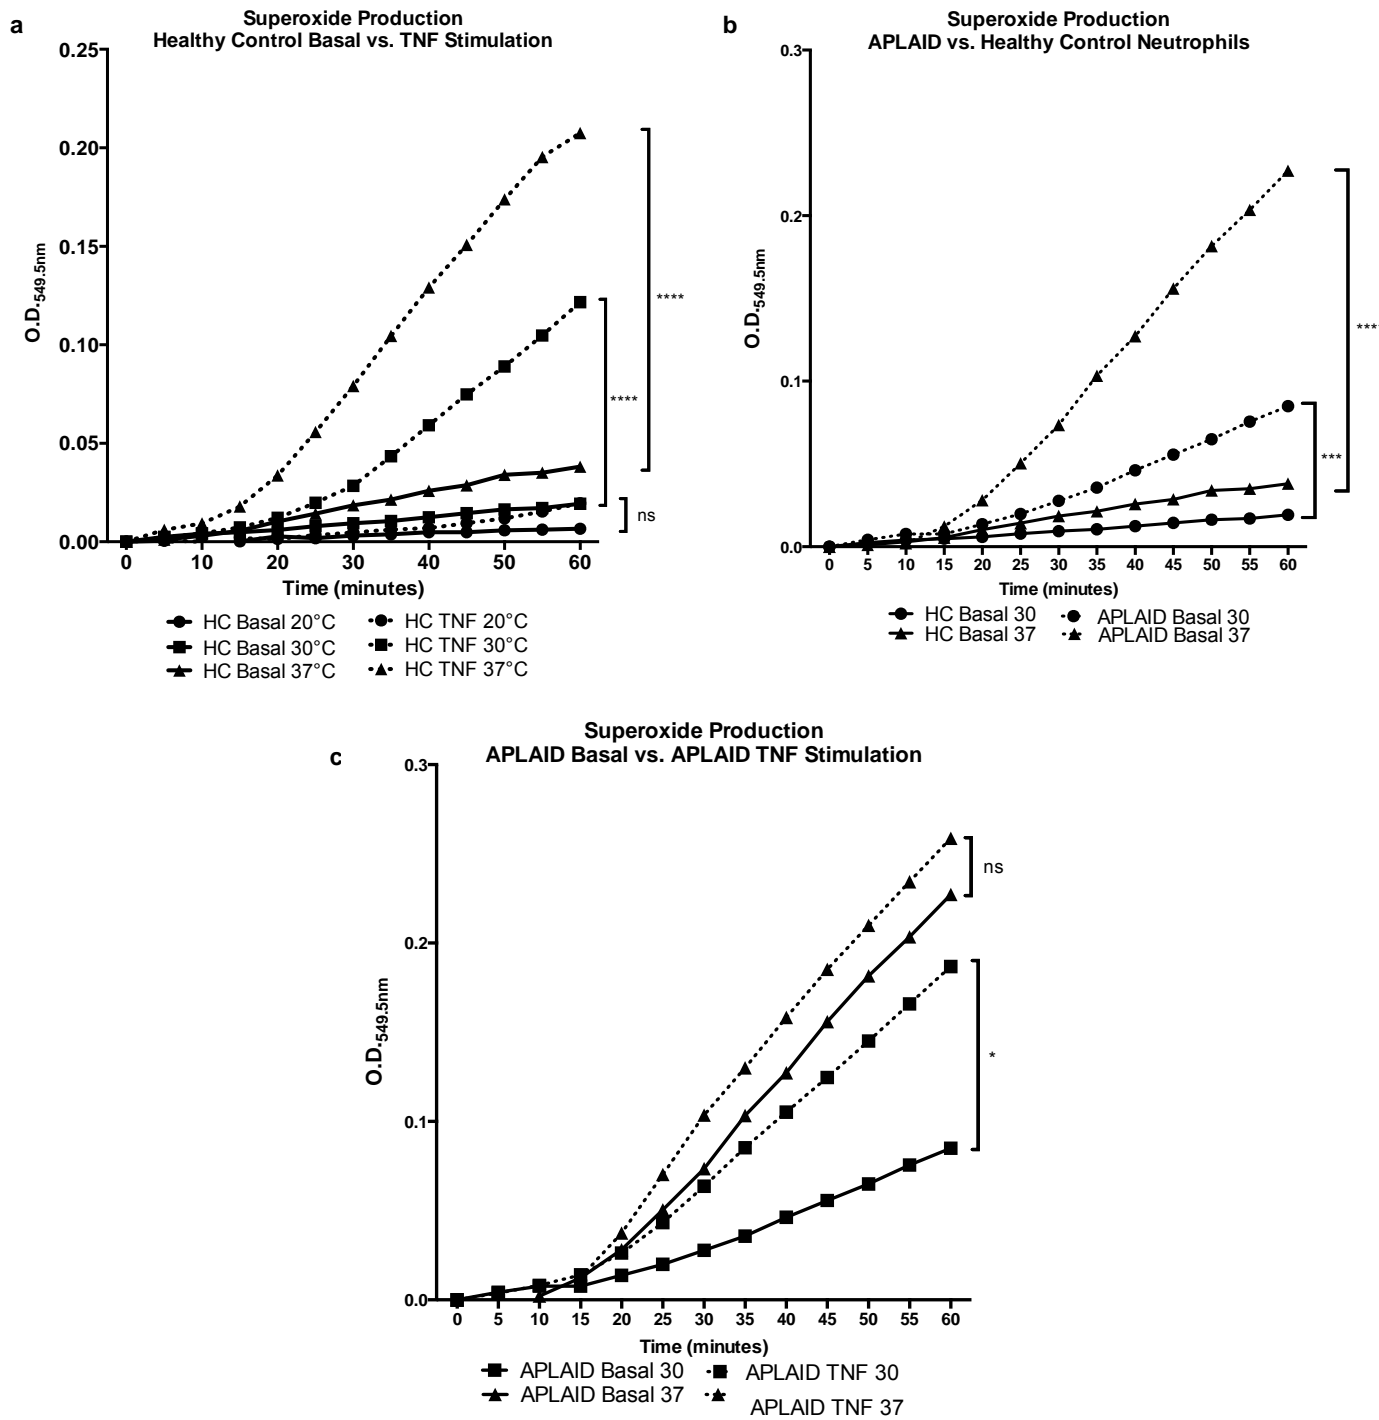

Neutrophil superoxide production. (a) Healthy control neutrophil  $O_2^{\bullet-}$  production in response to TNF- $\alpha$ . (b) APLAID neutrophil  $O_2^{\bullet-}$  production compared to healthy controls. (c) APLAID neutrophil  $O_2^{\bullet-}$  production in response to TNF- $\alpha$ . \* $p < 0.05$ , \*\*\* $p < 0.001$ , \*\*\*\* $p < 0.0001$ , unpaired t-test.

**eFigure 2.** Neutrophil Chemotaxis in Presence of Buffer or fMLF

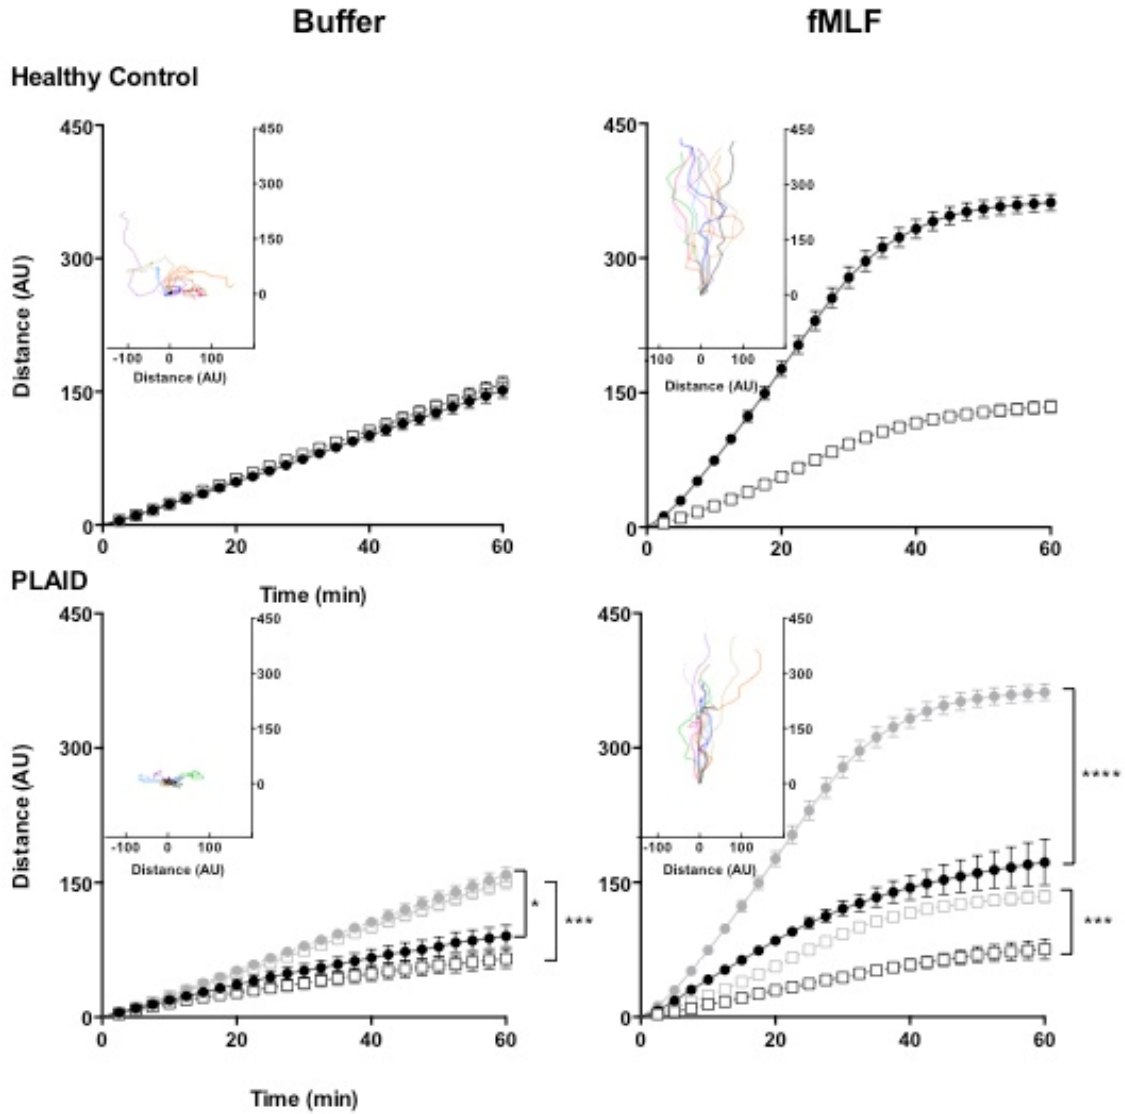

Line graphs represent resolved distance vectors (mean  $\pm$  SEM) for random migration (open squares) and directed migration (closed circles) from healthy controls (n=32) and PLAID patients (n=6). In the lower graphs, response of healthy control neutrophils has been added in gray for comparison. Inset images represent tracks of 10 individual neutrophils from one patient. \*p<0.05, \*\*\*p<0.001, \*\*\*\*p<0.0001, unpaired t-test
